# Supplementary material for: Multiscale relevance of natural images
Source: Springer Nature journal article supplement (doi:10.1038/s41598-023-41714-0), 2023-09-09
Supplement: 41598_2023_41714_MOESM1_ESM.pdf [file 41598_2023_41714_MOESM1_ESM.pdf]

# Supplementary Material

April 11, 2023

## A Generation of $1/f^\alpha$ Gaussian fields

The  $1/f^\alpha$  textures used in Sec. A are generated through a filtering procedure. Consider a field  $\phi(\mathbf{r})$  of given autocorrelation function  $C(\mathbf{r})$ . Using the convolution theorem one has  $\tilde{C}(\mathbf{q}) = |\tilde{\phi}(\mathbf{q})|^2$  in Fourier space with  $|\mathbf{q}| = f$ . A natural way to generate a random Gaussian field  $\phi$  with prescribed correlations is:

$$\phi = \mathcal{F}^{-1} \left( \sqrt{|\tilde{C}(\mathbf{q})|} \tilde{\eta}(\mathbf{q}) \right), \quad (1)$$

where  $\eta(\mathbf{r})$  is a Gaussian white noise. Note that, as a result, the textures display periodic boundary conditions. Also note that the  $H = 0$  (equivalently  $\alpha = 1$ ) case corresponds to logarithmic spatial correlations of the form (see e.g. M. Peskin, An introduction to quantum field theory (CRC press, 2018)):

$$C(\mathbf{r}) = -\lambda \left( \log \frac{r}{\xi} + \log 2 - \gamma \right), \quad (2)$$

where  $r = |\mathbf{r}|$ ,  $\xi^{-1}$  is a regularizing constant that can be interpreted as a low frequency cutoff, and  $\gamma$  is the Euler constant.
